# Supplementary material
Source: publisher figshare collection journal article supplement (https://acs.figshare.com/ndownloader/files/4859446)
Supplement: Supplementary file 1 [file 4859446]

## Sheet: Sheet1
model_id	met_id	symmetry
iRL2013	fum_c	C1:C4 C2:C3 C3:C2 C4:C1
iRL2013	succ_c	C1:C4 C2:C3 C3:C2 C4:C1
iDM2014_core	34hpp_c	C1:C1 C2:C2 C3:C3 C4:C4 C5:C9 C6:C8 C7:C7 C8:C6 C9:C5
iDM2014_core	fum_c	C1:C4 C2:C3 C3:C2 C4:C1
iDM2014_core	fum_e	C1:C4 C2:C3 C3:C2 C4:C1
iDM2014_core	fum_p	C1:C4 C2:C3 C3:C2 C4:C1
iDM2014_core	phpyr_c	C1:C1 C2:C2 C3:C3 C4:C4 C5:C9 C6:C8 C7:C7 C8:C6 C9:C5
iDM2014_core	ptrc_c	C1:C4 C2:C3 C3:C2 C4:C1
iDM2014_core	succ_c	C1:C4 C2:C3 C3:C2 C4:C1
iDM2014_core	succ_e	C1:C4 C2:C3 C3:C2 C4:C1
iDM2014_core	succ_p	C1:C4 C2:C3 C3:C2 C4:C1
iJS2012	34hpp_c	C1:C1 C2:C2 C3:C3 C4:C4 C5:C9 C6:C8 C7:C7 C8:C6 C9:C5
iJS2012	dha_c	C1:C3 C2:C2 C3:C1
iJS2012	fum_c	C1:C4 C2:C3 C3:C2 C4:C1
iJS2012	fum_e	C1:C4 C2:C3 C3:C2 C4:C1
iJS2012	phpyr_c	C1:C1 C2:C2 C3:C3 C4:C4 C5:C9 C6:C8 C7:C7 C8:C6 C9:C5
iJS2012	ptrc_c	C1:C4 C2:C3 C3:C2 C4:C1
iJS2012	succ_c	C1:C4 C2:C3 C3:C2 C4:C1
iJS2012	succ_e	C1:C4 C2:C3 C3:C2 C4:C1
iDM2014	34hpp_c	C1:C1 C2:C2 C3:C3 C4:C4 C5:C9 C6:C8 C7:C7 C8:C6 C9:C5
iDM2014	fum_c	C1:C4 C2:C3 C3:C2 C4:C1
iDM2014	fum_e	C1:C4 C2:C3 C3:C2 C4:C1
iDM2014	fum_p	C1:C4 C2:C3 C3:C2 C4:C1
iDM2014	phpyr_c	C1:C1 C2:C2 C3:C3 C4:C4 C5:C9 C6:C8 C7:C7 C8:C6 C9:C5
iDM2014	ptrc_c	C1:C4 C2:C3 C3:C2 C4:C1
iDM2014	succ_c	C1:C4 C2:C3 C3:C2 C4:C1
iDM2014	succ_e	C1:C4 C2:C3 C3:C2 C4:C1
iDM2014	succ_p	C1:C4 C2:C3 C3:C2 C4:C1
